# Supplementary material
Source: PubMed Central journal article supplement (PMC2527961)
Supplement: 0805303105_0805303105SI.pdf [file 0805303105_0805303105SI.pdf]

# Supporting Information

Fujino *et al.* 10.1073/pnas.0805303105

## SI Text: RT-PCR Analysis

RT-PCR experiments were as described by Fujino *et al.* (1). Total RNA (0.5  $\mu$ g) was reverse transcribed by ReverTra Ace (TOYOBO) with an Oligo (dT)<sub>20</sub> primer. The PCR was performed using KOD-plus (TOYOBO). Each PCR (10  $\mu$ l) con-

tained 0.5  $\mu$ l of cDNA template diluted fivefold. The specificity of the primer to the transgene of the functional *qLTG3-1* (F: CGGCTCATGCCCTAGTCC, R: GTGTCGATCGGGCA-TCTT) was confirmed by the sequencing of the PCR products. *Ubi2* was used as a loading control (2).

1. Fujino K, *et al.* (2008) *NARROW LEAF 7* controls leaf shape mediated by auxin in rice. *Mol Genet Genomics* 279:499–507.

2. Yang G, *et al.* (2005) A two-edged role for the transposable element *Kiddo* in the rice *ubiquitin2* promoter. *Plant Cell* 17:1559–1568.

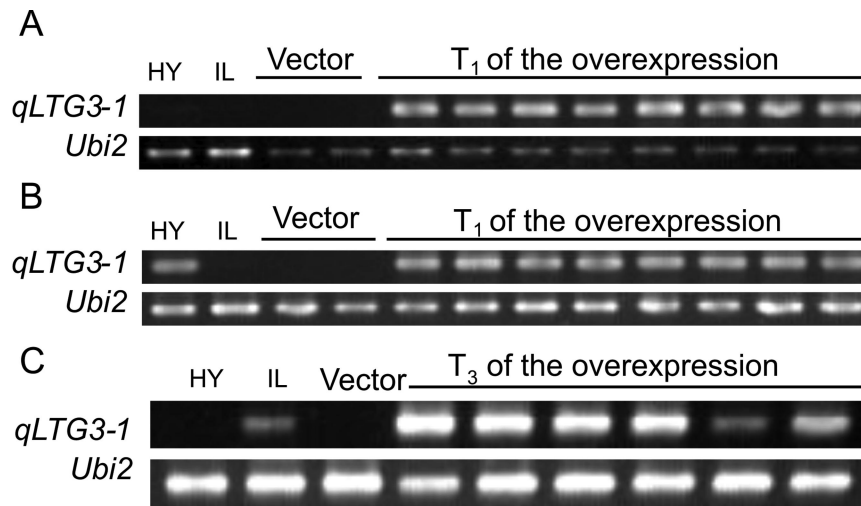

**Fig. S1.** Expression of *qLTG3-1* measured by semiquantitative RT-PCR analysis. RNA extracted from leaves (A), young panicles (B), and embryos after 1 day at 30°C (C) of Hayamasari (HY), Italice Livorno (IL), the NIL, the vector controls, and the transgenic lines were used. *Ubi2* was used as a loading control in the RT-PCR experiment.



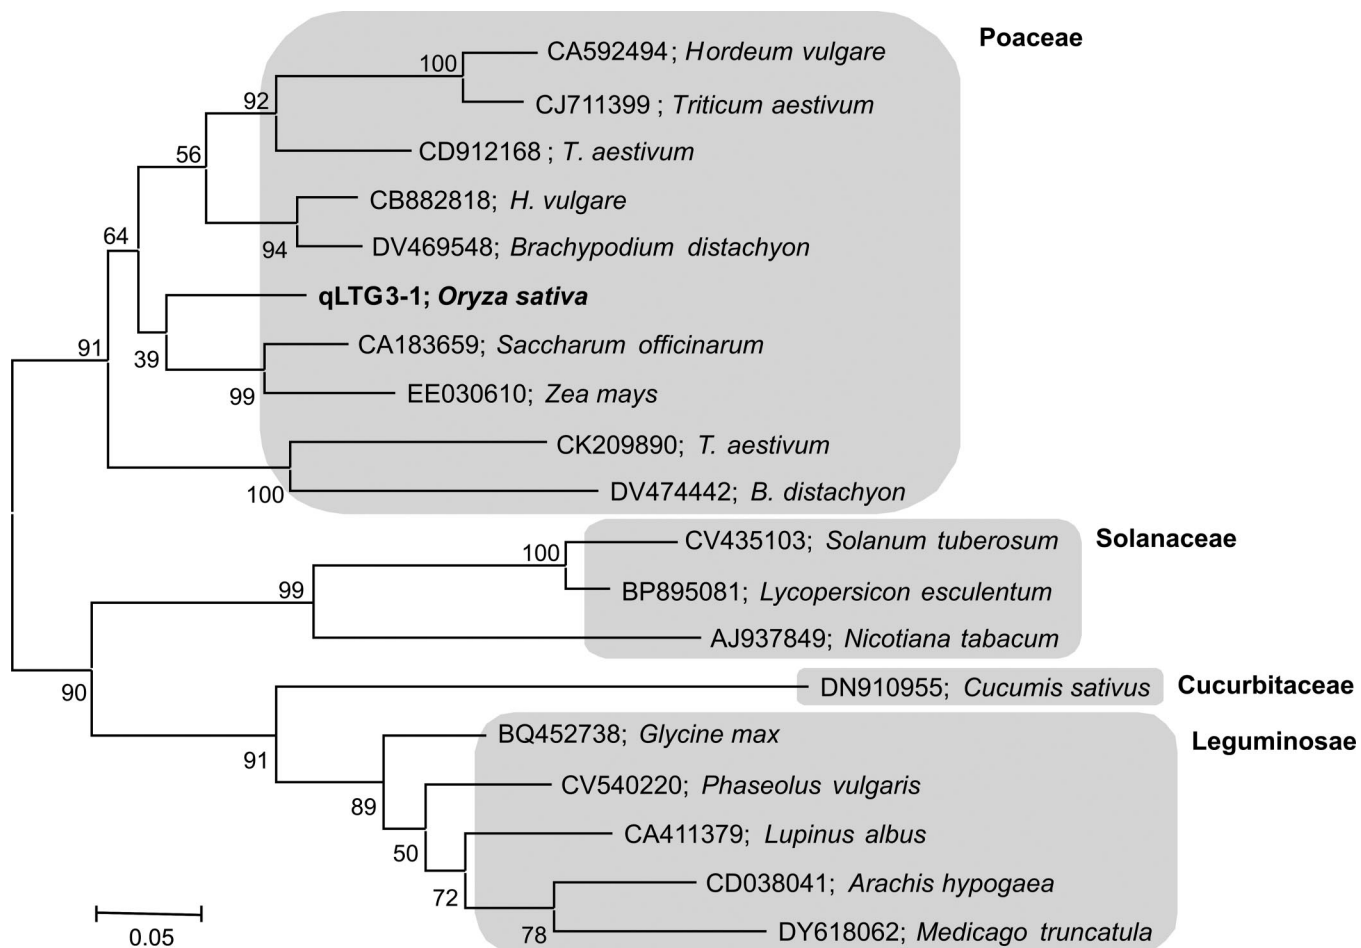

**Fig. S3.** Phylogenetic tree of qLTG3-1 and related proteins. The phylogenetic tree was constructed using CLUSTAL W. Bootstrap analysis values are shown at the nodal branches. The indicated scale represents 0.05 aa substitutions per site. The accession numbers and plant species are shown.



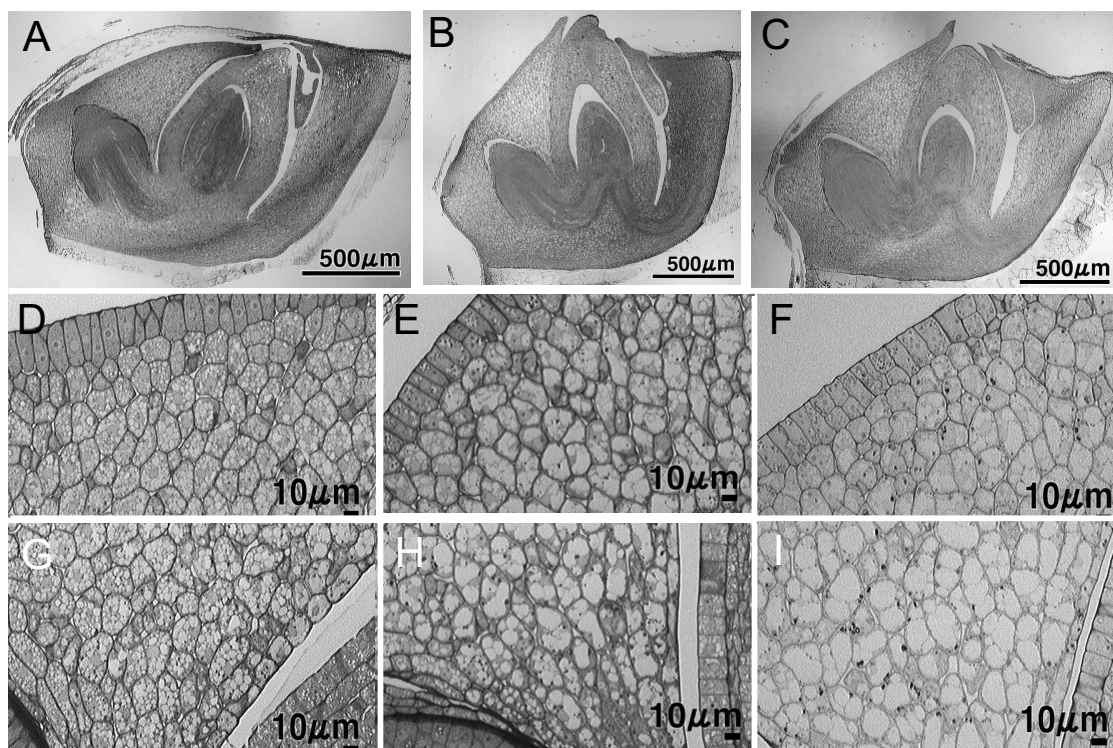

**Fig. S4.** Characterization of the morphological changes in seed germination at 15°C. (A–C) Embryos incubated for 3, 5, and 3 days, respectively, at 15°C. (D–F) Close up view of an area of the epidermal-side of the epiblast. (G–I) Close up view of an area on the inner-side of the epiblast. Hayamasari; (A, B, D, E, G, and H), NIL; (C, F, and I).



**Table S1. List of the SSR and STS markers developed and used in this study**

| Category     | Type                    | Marker         | Marker position in mapping | Primer                    |                           | Position                |         |
|--------------|-------------------------|----------------|----------------------------|---------------------------|---------------------------|-------------------------|---------|
|              |                         |                |                            | Upper (5'-3')             | Lower (5'-3')             |                         |         |
| Fine mapping | SSR                     | SSR097627-33.1 |                            | CCAACAACAAGGCAATCGCG      | CGAGGGGGAAAAGGGCTAGA      | 67,539                  |         |
|              | SSR                     | SSR097627-22.1 |                            | TGAGTTTGGAGTGATTGGAT      | CTCAAAGAATGACACCGATG      | 99,844                  |         |
|              | SSR                     | GBR3001a       | a                          | CCTCTCCCTTCTGTGTCA        | GGGATTTTTTCATCGAAATT      | 117,791                 |         |
|              | SSR                     | SSR125411-4.1  | A                          | GATCGATCGACATTACACAC      | GCATGCATGGACTAGTAATT      | 157,388                 |         |
|              | SSR                     | SSR118673-3.1  | D                          | CAATTAAGTTAACCCTGATGA     | GCTTGTGCTGTTCTGTACT       | 196,244                 |         |
|              | STS                     | STS73-28       | I                          | GCTTATCCGATTCGCTGCGGTTA   | TTGAGACATGCCTAATTAAGCGAAC | 253,333                 |         |
|              | SSR                     | SSR107224-21.1 |                            | TTAGGTAAAATTAAGGCACC      | TCTGTTGTAGGTGTAGCAGC      | 359,550                 |         |
|              | SSR                     | SSR107224-13.1 | b                          | ATTTGTGTGCTGCATGCAG       | ACTCGATCTCGTGTGTGCCA      | 370,778                 |         |
|              | SSR                     | SSR113930-23.1 | c                          | GCAACTCTGCTAAACGAATT      | TAGCCCCATGATAAGAGATT      | 514,861                 |         |
|              | SSR                     | SSR105363-21.1 |                            | GCTCGCTCCCCACATTTTAA      | GGCATCAGCAACAGCAGCTA      | 1,134,844               |         |
|              | SSR                     | GBR3002a       | d                          | AGAGCATAACATCAAAGCCA      | ATAGCTCCAATTCGATCTTC      | 1,322,466               |         |
|              | High-resolution mapping | SSR            | S70                        |                           | AGGGCTAAGTCGGAAGAATCAT    | GGAGTCGTGGGGTCTGGTGT    | 157,592 |
|              |                         | SSR            | S65                        |                           | CATATTCAAATAGCTAAGGGAGC   | CGCACACATACAAGAGTTTTACT | 160,269 |
|              | indel                   | S51a           |                            | TCAGCAAATATCATCTCCA       | GTGTCACCCTAGTGAAAAAATTT   | 165,027                 |         |
|              | SNP                     | S51b           |                            | TCAGCAAATATCATCTCCA       | GTGTCACCCTAGTGAAAAAATTT   | 165,053                 |         |
|              | SSR                     | S57            | B                          | CTCACATTCCTTGCTATGCT      | CCATCAATTAATTCITCCGATC    | 17,349                  |         |
|              | indel                   | S21a           |                            | TGAAAATACACGCATGGCTG      | GAGAGCGAATGCGCTGCTTC      | 174,798                 |         |
|              | SSR                     | S21b           |                            | TGAAAATACACGCATGGCTG      | GAGAGCGAATGCGCTGCTTC      | 174,986                 |         |
|              | SNP                     | S43            | C                          | TTAATCCATGGAAGTTAAAGAATAT | GTCCATGATTAGCTATAAGTGCTAC | 191,822                 |         |
|              | indel                   | S103a          | E                          | CAGCTAAGCTACCAAAGCCCA     | TTATCAGCCCATTTCAGCACGTT   | 198,461                 |         |
|              | SNP                     | S103b          |                            | CAGCTAAGCTACCAAAGCCCA     | TTATCAGCCCATTTCAGCACGTT   | 198,464                 |         |
|              | SSR                     | S107           | F                          | CGCAGCGTATATTTGAATG       | CAGATTAATGGTTAGTTAACCAGGC | 200,192                 |         |
|              | SSR                     | S306           | G                          | ACATGCATGCAGTGATTTCCG     | CTACTGCTCATCACTACAAAGAGTG | 230,403                 |         |
|              | SSR                     | S179           | H                          | CGGCGATGGTTAGTTAAATTATCC  | CAAGCTAGGCAAAAGGTGGTATT   | 233,798                 |         |
|              | SSR                     | S218           |                            | GTTAGTCATATCAGCCCCAAGAAC  | ATTTGCCATAAACTACCGCAC     | 253,122                 |         |

Position indicates the location of the upper primer in IRGSP build 3 in RAP-DB. SSR, simple sequence repeat; STS, sequence-tagged site.
